# Supplementary material for: Mapping Attenuation Determinants in Enterovirus-D68
Source: MDPI journal article supplement (doi:10.3390/v12080867), 2020-08-08
Supplement: s1 [file s1]

|            |            |            |            |             |            |            |            |             |     |
|------------|------------|------------|------------|-------------|------------|------------|------------|-------------|-----|
|            |            | 20         |            | 40          |            | 60         |            | 80          |     |
| 49129-5UTR | TTAAACAGC  | CTTGGGGTTG | TTCCCACTCC | AAGGGCCCAC  | GTGGCGGCTA | GTACTCTGGT | ACTTCGGTAC | CTTTGTACGC  | 80  |
| 49131-5UTR | .....      | .....      | .....      | .....       | .....      | .....      | .....      | .....       | 80  |
| 4231-5UTR  | .....      | .....      | .....      | .....       | .....      | .....      | .....      | .....       | 80  |
| 49130-5UTR | .....      | .....      | .....      | .....       | .....      | .....      | .....      | .....       | 80  |
|            |            | 100        |            | 120         |            | 140        |            | 160         |     |
| 49129-5UTR | CTGTTTTATC | TCCCTTCCCA | ATGTAACCTA | GAAGTTCTTA  | AATCAATGCT | CAATAGGTGG | GGCGCAAACC | AGCGCTCTCA  | 160 |
| 49131-5UTR | .....      | .....      | .C.....    | .....C..... | .....G...  | .....      | ..T.....   | ...A...T.   | 160 |
| 4231-5UTR  | .....      | .....      | .....      | .....C..... | .....G...  | .....      | A.....     | .....T.     | 160 |
| 49130-5UTR | .....      | .....      | .....T...  | .....       | .....      | .....      | .....      | .....       | 160 |
|            |            | 180        |            | 200         |            | 220        |            | 240         |     |
| 49129-5UTR | TGAGCAAGCA | CTCCTGTCTC | CCCGGTGAGG | TTGTATAAAC  | TGTTCCACG  | GTTGAAAACA | ACCTATCCGT | TATCCGCTAT  | 240 |
| 49131-5UTR | .....      | .....      | .....      | ..A.....    | .....      | .....T.    | .....      | .....       | 240 |
| 4231-5UTR  | .....      | ..T...T..  | .....C..   | ..A.....    | .....      | .....T.    | .....      | .....       | 240 |
| 49130-5UTR | .....      | .....      | .....      | .....       | .....      | .....      | .....      | .....       | 240 |
|            |            | 260        |            | 280         |            | 300        |            | 320         |     |
| 49129-5UTR | AGTACTTCGA | GAAACCTAGT | ACCACCTTTG | GATTGTTGAC  | GCGTTGCGCT | CAGCACACTA | ACCCGTGTGT | AGCTTGGGTC  | 320 |
| 49131-5UTR | .....      | .....      | .T.....    | .....       | .....      | .....      | .....      | .....       | 320 |
| 4231-5UTR  | .....      | .....      | .T.....    | .....       | .....      | .....      | .....      | .....       | 320 |
| 49130-5UTR | .....      | .....      | .....      | .....       | .....      | .....      | .....      | .....       | 320 |
|            |            | 340        |            | 360         |            | 380        |            | 400         |     |
| 49129-5UTR | GATGAGTCTG | GACATACCTC | ACTGGCGACA | GTGGTCCAGG  | CTGCGTTGGC | GGCCTACTCA | TGGTGAAAGC | CATGAGACGC  | 400 |
| 49131-5UTR | .....      | .....C.    | .....      | .....       | .....      | .....      | .....A.    | .....       | 400 |
| 4231-5UTR  | .....      | .....C.    | .....      | .....       | .....      | .....      | .....A.    | .....       | 400 |
| 49130-5UTR | .....      | .....      | .....      | .....       | .....      | .....      | .....      | .....       | 400 |
|            |            | 420        |            | 440         |            | 460        |            | 480         |     |
| 49129-5UTR | TAGACATGAA | CAAGGTGTGA | AGAGTCTATT | GAGCTACTAT  | AGAGTCCTCC | GGCCCCTGAA | TGCGGCTAAT | CCTAACCATG  | 480 |
| 49131-5UTR | .....      | .....      | .....      | .....       | .....      | .....      | .....      | ..C.....    | 480 |
| 4231-5UTR  | .....      | .....      | .....      | .....       | .....      | .....      | .....      | .....       | 480 |
| 49130-5UTR | .....      | .....      | .....      | .....       | .....      | .....      | .....      | .....       | 480 |
|            |            | 500        |            | 520         |            | 540        |            | 560         |     |
| 49129-5UTR | GAGCAAGTGC | TCACAGGCCA | GTGAGTTGCT | TGTCGTAATG  | CGCAAGTCCG | TGGCGGAACC | GACTACTTTG | GGTGTCCGTG  | 560 |
| 49131-5UTR | .....      | .....A..   | .....      | .....       | .....      | .....      | .....      | .....       | 560 |
| 4231-5UTR  | .....      | .....A..   | .....      | .....       | .....      | .....      | .....      | .....A...   | 560 |
| 49130-5UTR | .....      | .....      | .....      | .....       | .....      | .....      | .....      | .....       | 560 |
|            |            | 580        |            | 600         |            | 620        |            | 640         |     |
| 49129-5UTR | TTTCACTTTT | TACTTTTATG | ACTGCTTATG | GTGACAATTT  | GATATTGTTA | CCATTTAGCT | TGTCAAATCA | ATTGCAAAAG  | 640 |
| 49131-5UTR | .....      | ..CC.....  | .....      | .....       | .....      | .....      | .....      | .....G..... | 640 |
| 4231-5UTR  | .....      | ..CC.....  | .....      | .....       | .....G     | .....      | .....      | .....       | 640 |
| 49130-5UTR | .....      | .....      | .....      | .....       | .....      | .....      | .....      | .....       | 640 |
|            |            | 660        |            | 680         |            |            |            |             |     |
| 49129-5UTR | ATCCTAAATC | TTATTTATCA | ACTTGCATCT | TGATAACTTT  | AATTTGAAAA | TTTTAACA   |            |             | 698 |
| 49131-5UTR | ....C..G.. | .....      | .....T.    | .....CC     | .....G.    | ...-..T.   |            |             | 697 |
| 4231-5UTR  | .....      | .....      | .....T.    | .....       | .....G.    | ...-..T.   |            |             | 697 |
| 49130-5UTR | .....C..   | .....      | .....      | .....       | .....      | .....      |            |             | 698 |
