# Supplementary material for: Mapping Attenuation Determinants in Enterovirus-D68
Source: MDPI journal article supplement (doi:10.3390/v12080867), 2020-08-08
Supplement: s1 [file s1]

|                   |             |             |             |              |             |              |             |             |      |
|-------------------|-------------|-------------|-------------|--------------|-------------|--------------|-------------|-------------|------|
| 49129-polypeptide | MGAQVTRQQT  | GTHENANIAT  | NGSHITYNQI  | NFYKDSYAAS   | ASKQDFSQDP  | SKFTEPVVEG   | LKAGAPVLKS  | PSAEACGYSD  | 80   |
| 49131-polypeptide | .....       | .....       | .....       | .....        | .....       | .....        | .....V..... | .....       | 80   |
| 4231-polypeptide  | .....       | .....       | .....       | .....        | .....       | .....        | .....V..... | .....       | 80   |
| 49130-polypeptide | .....       | .....       | .....       | .....        | .....       | .....        | .....       | .....       | 80   |
| 49129-polypeptide | RVLQLKLGNS  | AIVTQEAANY  | CCAYGEWPNY  | LPDHEAVID    | KPTQPETATD  | RFYTLKSVKW   | ETGSTGWWWK  | LPDALNNIGM  | 160  |
| 49131-polypeptide | .....       | .....       | .....       | .....        | .....       | .....R.....  | .....A..... | .....       | 160  |
| 4231-polypeptide  | .....       | .....       | .....       | .....        | .....       | .....R.....  | .....A..... | .....       | 160  |
| 49130-polypeptide | .....       | .....       | .....       | .....        | .....       | .....        | .....       | .....       | 160  |
| 49129-polypeptide | FGQNVQHYYL  | YRSGFLIHVQ  | CNATKFHQGA  | LLVVAIPEHQ   | RGAHNTNTSP  | GFDDIMKGE    | GGTFNHYPVL  | DDGTS LACAT | 240  |
| 49131-polypeptide | .....       | .....       | .....       | .....        | .....       | .....        | .....       | .....       | 240  |
| 4231-polypeptide  | .....       | .....       | .....       | .....        | .....       | .....        | .....       | .....       | 240  |
| 49130-polypeptide | .....       | .....       | .....       | .....        | .....       | .....        | .....       | .....       | 240  |
| 49129-polypeptide | IFPHQWINLR  | TNNSATIVLP  | WMNAAPMDFP  | LRHNQWTLAI   | IPVVPLGTRT  | TSSMVPITVS   | IAPMCCEFNG  | LRHAITQGV   | 320  |
| 49131-polypeptide | .....       | .....       | .....       | .....        | .....       | M.....       | .....       | .....       | 320  |
| 4231-polypeptide  | .....       | .....       | .....       | .....        | .....       | M.....       | .....       | .....       | 320  |
| 49130-polypeptide | .....       | .....       | .....       | .....        | .....       | .....        | .....       | .....       | 320  |
| 49129-polypeptide | TYLLPGSGQF  | LTTDDHSSAP  | ALPCFNPTPE  | MHIPGQVRNM   | LEVQVESMM   | EINNTESAVG   | MERLKVDISA  | LTDVDQLLFN  | 400  |
| 49131-polypeptide | .....       | .....       | V.....      | .....        | .....       | .....        | .....       | .....       | 400  |
| 4231-polypeptide  | .....       | .....       | V.....      | .....H.....  | .....       | .....        | .....       | .....       | 400  |
| 49130-polypeptide | .....       | .....       | .....       | .....        | .....       | .....        | .....       | .....       | 400  |
| 49129-polypeptide | IPLDIQLDGP  | LRNTLVGNIS  | RYYTHWSGSL  | EMTFMFCGSF   | MATGKLILCY  | TPPGGSCPTT   | RETAMLGTHI  | VWDFGLQSSV  | 480  |
| 49131-polypeptide | .....       | .....       | .....       | .....        | .....       | .....        | .....V..... | .....       | 480  |
| 4231-polypeptide  | .....       | .....       | .....       | .....        | .....       | .....        | .....       | .....       | 480  |
| 49130-polypeptide | .....V..... | .....       | .....       | .....        | .....       | .....        | .....       | .....       | 480  |
| 49129-polypeptide | TLIIPWISGS  | HYRMFNDAK   | STNANVG YVT | CFMQTNLIVP   | SESSDTCSLI  | GFIAAKNDFS   | LRLMRDSPDI  | GQLDHLHAAE  | 560  |
| 49131-polypeptide | .....       | .....       | .....       | .....        | .....       | .....D.....  | .....       | .....N..... | 560  |
| 4231-polypeptide  | .....       | .....       | .....       | .....        | .....       | .....D.....  | .....       | .....I..... | 560  |
| 49130-polypeptide | .....       | .....       | .....       | .....        | .....       | .....D.....  | .....       | .....P..... | 560  |
| 49129-polypeptide | AAYQIESIK   | TATDTVKSEI  | NAELGVVPSL  | NAVETGVTSN   | TEPEEAIQTR  | TVINQHG VSE  | TLVENFLSRA  | ALVSKRSFEY  | 640  |
| 49131-polypeptide | .....       | .....       | .....       | A.....       | .....       | .....        | .....       | .....       | 640  |
| 4231-polypeptide  | .....       | .....       | .....       | A.....       | .....       | .....        | .....       | .....       | 640  |
| 49130-polypeptide | .....       | .....       | .....       | A.....       | .....       | .....        | .....       | .....       | 640  |
| 49129-polypeptide | KDHTSSTARA  | DKNFFKWTIN  | TRSFVQLRRK  | LELFTYLRFD   | AEITILT TTA | VNGSGNNTYV   | GLPDLTLQAM  | FVPTGALTPE  | 720  |
| 49131-polypeptide | .....A.QT   | .....       | .....       | .....        | .....       | .....S.....  | .....       | .....       | 720  |
| 4231-polypeptide  | .....A.Q.   | .....       | .....       | .....        | .....       | .....S.....  | .....       | .....       | 720  |
| 49130-polypeptide | .....A.Q.   | .....       | .....       | .....        | .....       | .....S.....A | .....       | .....       | 720  |
| 49129-polypeptide | KQDSFHWQSG  | SNASVFFKIS  | DPPARITIPF  | MCINSAYSVF   | YDGFAGFEKN  | GLYGINPADT   | IGNLCVRIVN  | EHQPVGFTVT  | 800  |
| 49131-polypeptide | .....       | .....       | M.....      | .....        | .....S..... | .....        | .....       | .....       | 800  |
| 4231-polypeptide  | .....       | .....       | M.....      | .....        | .....S..... | .....        | .....       | .....       | 800  |
| 49130-polypeptide | .....       | .....       | .....       | .....        | .....       | .....        | .....       | .....       | 800  |
| 49129-polypeptide | VRVYMKPKHI  | KAWAPRPRT   | LPYMSIANAN  | YKGKQRAPNA   | LSAIGNRDS   | VKTMPHNIVN   | TGPGFGGVFV  | GSFKIINYHL  | 880  |
| 49131-polypeptide | .....       | .....       | .....       | .....G.....  | .....N..... | .....T.....  | .....       | .....       | 880  |
| 4231-polypeptide  | .....       | .....       | .....       | .....K.....  | .....N..... | .....T.....  | .....       | .....       | 880  |
| 49130-polypeptide | .....       | .....       | .....       | .....RE..... | .....       | .....        | .....       | .....       | 880  |
| 49129-polypeptide | ATTEERQSAI  | YVDWQSDVLV  | TPIAAHGRHQ  | IARCKCNTGV   | YYCRHKNSY   | PICFEGPGIQ   | WIEQNEYYP   | RYQTNVLLAV  | 960  |
| 49131-polypeptide | .....K..... | .....       | .....       | .....        | .....D..... | .....        | .....S..... | .....       | 960  |
| 4231-polypeptide  | .....       | .....       | .....       | .....        | .....D..... | .....        | .....S..... | .....       | 960  |
| 49130-polypeptide | .....A..... | .....       | .....       | .....        | .....       | .....        | .....       | .....       | 960  |
| 49129-polypeptide | GPAEAGDCGG  | LLVCPHG VIG | LLTAGGGGIV  | AFTDIRNLLW   | LDTDAMEQGI  | TDYIQNLGNA   | FGAGFTETIS  | NKAKEVQDML  | 1040 |
| 49131-polypeptide | .....       | .....       | .....       | .....        | .....V..... | .....        | .....       | .....       | 1040 |
| 4231-polypeptide  | .....       | .....       | .....       | .....        | .....V..... | .....        | .....       | .....N..... | 1040 |
| 49130-polypeptide | .....       | .....       | .....       | .....        | .....       | .....        | .....       | .....       | 1040 |
| 49129-polypeptide | IGESSLLEKL  | LKALIKIISA  | LVIVIRNSED  | LVTVTATLAL   | LGCHDSPWSY  | LKQKVC SYLG  | IPYVPRQGES  | WLKKFTEACN  | 1120 |
| 49131-polypeptide | .....       | .....       | .....       | .....        | .....       | .....        | .....S..... | .....       | 1120 |
| 4231-polypeptide  | .....       | .....       | .....       | .....        | .....       | .....        | .....S..... | .....       | 1120 |
| 49130-polypeptide | .....       | .....       | .....       | .....        | .....       | .....        | .....       | .....       | 1120 |
| 49129-polypeptide | ALRGLDWLSQ  | KIDKFINWLK  | TKILPEAREK  | YEFVQRLKQL   | PVIENQVSTI  | EHSCPTTEQQ   | QALFNNVQYY  | SHYCRKYAPL  | 1200 |
| 49131-polypeptide | .....       | .....       | N.....      | .....        | .....       | .....        | .....       | .....       | 1200 |
| 4231-polypeptide  | .....       | .....       | N.....      | .....        | .....       | .....        | .....       | .....       | 1200 |
| 49130-polypeptide | .....       | .....       | .....       | .....        | .....       | .....        | .....       | .....       | 1200 |

|                   |             |             |                   |             |              |             |            |             |      |
|-------------------|-------------|-------------|-------------------|-------------|--------------|-------------|------------|-------------|------|
| 49129-polypeptide | YAVEAKRVVA  | LEKKINNYIQ  | FKSKSRIEPV        | CLIIHGSPGT  | GKSVASNLIA   | RAITEKLGGD  | IYSLPPDPKY | FDGYKQQTVV  | 1280 |
| 49131-polypeptide | .....A.     | .....       | .....             | .....       | .....        | .....       | .....      | .....       | 1280 |
| 4231-polypeptide  | .....A.     | .....       | .....             | .....       | .....        | .....       | .....      | .....       | 1280 |
| 49130-polypeptide | .....       | .....       | .....             | .....       | .....        | .....       | .....      | .....       | 1280 |
| 49129-polypeptide | LMDDLQNP    | GNDISMFCQM  | VSTVDFIPPM        | ASLEEKGTLY  | TSPFLIATTN   | AGSIHAPTVS  | DSKALSRRFK | FDVDIEVTD   | 1360 |
| 49131-polypeptide | .....       | .....       | .....             | .....       | .....        | .....       | .....      | .....       | 1360 |
| 4231-polypeptide  | .....       | .....       | .....             | .....       | .....        | .....       | .....      | .....       | 1360 |
| 49130-polypeptide | .....       | .....       | .....             | .....       | .....        | .....       | .....      | .....       | 1360 |
| 49129-polypeptide | YKDSNKLMS   | RAVEMCKPDG  | CAPTNYKRCC        | PLICGKAIQF  | RDRRTNARST   | IDMLVTDIIK  | EYRTRNSTQD | KLEALFQGGP  | 1440 |
| 49131-polypeptide | .....       | .....D      | .....             | .....       | .....        | .....       | .....      | .....       | 1440 |
| 4231-polypeptide  | .....       | .....D      | .....             | .....       | .....        | .....       | .....      | .....       | 1440 |
| 49130-polypeptide | .....       | .....       | .....             | .....       | .....        | .....       | .....      | .....       | 1440 |
| 49129-polypeptide | QFKEIKISVT  | PDTPAPDAIN  | DLRSVDSQE         | VRDYCQKKGW  | IVVHPSNELI   | VEKHISRIFI  | TLQAIATFVS | IAGVVYVIYK  | 1520 |
| 49131-polypeptide | .....       | .....       | .....             | .....       | .....I.....L | .....       | .....      | .....       | 1520 |
| 4231-polypeptide  | .....       | .....       | .....             | .....       | .....I.....L | .....N..... | .....      | .....       | 1520 |
| 49130-polypeptide | .....       | .....       | .....             | .....       | .....R.....  | .....       | .....      | .....       | 1520 |
| 49129-polypeptide | LFAGIQGPYT  | GIPNPKPKVP  | SLRTAKVQGP        | GFDFAQAIMK  | KNTVIARTEK   | GEFTMLGVYD  | RVAVIPHTAS | VGETIYINDV  | 1600 |
| 49131-polypeptide | .....       | .....       | .....             | .....       | .....        | .....       | .....      | .....       | 1600 |
| 4231-polypeptide  | .....       | .....       | .....             | .....       | .....        | .....       | .....      | .....       | 1600 |
| 49130-polypeptide | .....       | .....       | .....             | .....       | .....        | .....       | .....      | .....       | 1600 |
| 49129-polypeptide | ETKVLDACAL  | RDLTDTNLEI  | TIVKLDRNQK        | FRDIRHFLPR  | YEDDYNDAYL   | SVHTSKFPM   | YIPVGQVTNY | GFLNLGGTPT  | 1680 |
| 49131-polypeptide | .....       | .....       | .....             | .....       | .....        | .....       | .....      | .....       | 1680 |
| 4231-polypeptide  | .....       | .....       | .....             | .....       | .....        | .....       | .....      | .....       | 1680 |
| 49130-polypeptide | .....       | .....       | .....             | .....       | .....        | .....       | .....      | .....       | 1680 |
| 49129-polypeptide | HRILMYNFPT  | RAGQCQGVVT  | TTGKVIGIHV        | GGNGAQGFAA  | MLLHSYFSDT   | QGEIVSSEKS  | GVCINAPAKT | KLQPSVFHQV  | 1760 |
| 49131-polypeptide | .....       | .....       | .....             | .....       | .....T.....  | .....       | .....      | .....       | 1760 |
| 4231-polypeptide  | .....       | .....       | .....             | .....       | .....T.....  | .....       | .....      | .....       | 1760 |
| 49130-polypeptide | .....       | .....       | .....             | .....       | .....T.....  | .....       | .....      | .....       | 1760 |
| 49129-polypeptide | FEKSKEPAVL  | NPKDPRPKTD  | FEEAIFSKYT        | GNKIMLMDEY  | MEEAVDHYVG   | CLEPLDISVD  | PIPLESAMYG | MDGLEALDLT  | 1840 |
| 49131-polypeptide | .....       | .....       | .....             | .....       | .....        | .....       | .....      | .....       | 1840 |
| 4231-polypeptide  | .....       | .....       | .....             | .....       | .....        | .....       | .....      | .....       | 1840 |
| 49130-polypeptide | .....       | .....       | .....             | .....       | .....        | .....       | .....      | .....       | 1840 |
| 49129-polypeptide | TSAGFPYLLQ  | GKKKRDIFNR  | HTRDTSEMTK        | MLEKYGVDLP  | FVTFVKDEL    | SREKVEKGKS  | RLIEASSLND | SVAMRVAFGN  | 1920 |
| 49131-polypeptide | .....       | .....       | .....T.....       | .....       | .....        | .....       | .....      | .....       | 1920 |
| 4231-polypeptide  | .....       | .....       | .....K.....T..... | .....       | .....        | .....       | .....      | .....       | 1920 |
| 49130-polypeptide | .....       | .....       | .....             | .....       | .....        | .....       | .....      | .....       | 1920 |
| 49129-polypeptide | LYATFHNNPG  | TATGSAVGCD  | PDIFWSKIP         | LLDGEIFAAD  | YTGIDASLSP   | VWFACKKKVL  | IKLGYTHQTS | FIDYLCHSVH  | 2000 |
| 49131-polypeptide | .....S..... | .....       | .....             | .....       | .....        | .....       | .....      | .....       | 2000 |
| 4231-polypeptide  | .....S..... | .....       | .....             | .....       | .....        | .....       | .....      | .....       | 2000 |
| 49130-polypeptide | .....       | .....       | .....             | .....       | .....        | .....       | .....      | .....       | 2000 |
| 49129-polypeptide | LYKDKKYIVN  | GGMPSGSSGT  | SIFNTMINNI        | IIRTLIRVY   | KGIDLDQFKM   | IAYGDDVIAS  | YPHKIDPGLL | AEAGKQYGLV  | 2080 |
| 49131-polypeptide | .....R..... | .....       | .....             | .....       | .....        | .....       | .....      | .....H..... | 2080 |
| 4231-polypeptide  | .....R..... | .....       | .....             | .....       | .....        | .....       | .....      | .....H..... | 2080 |
| 49130-polypeptide | .....       | .....       | .....             | .....       | .....        | .....       | .....      | .....       | 2080 |
| 49129-polypeptide | MTPADKGTSF  | IDTNWENVTF  | LKRYFRADDQ        | YPFLIHPVMP  | MKEIHESI     | TKDPRNTQDH  | VRSLCYLAWH | NGEEAYNEFC  | 2160 |
| 49131-polypeptide | .....       | .....V..... | .....             | .....       | .....        | .....       | .....      | .....D..... | 2160 |
| 4231-polypeptide  | .....       | .....V..... | .....             | .....L..... | .....        | .....       | .....      | .....       | 2160 |
| 49130-polypeptide | .....       | .....       | .....             | .....       | .....        | .....       | .....      | .....       | 2160 |
| 49129-polypeptide | RKIRSVPVGR  | ALTLPAYSSL  | RRKWLDSE*         |             |              |             |            |             | 2189 |
| 49131-polypeptide | .....       | .....       | .....             |             |              |             |            |             | 2189 |
| 4231-polypeptide  | .....       | .....       | .....             |             |              |             |            |             | 2189 |
| 49130-polypeptide | .....       | .....       | .....             |             |              |             |            |             | 2189 |
